# Supplementary material for: Regulating the electronic structure of CoMoO4 microrod by phosphorus doping: an efficient electrocatalyst for the hydrogen evolution reaction
Source: Royal Society of Chemistry journal article supplement (doi:10.1039/d0dt02571b), 2020-01-01
Supplement: d0dt02571b1.pdf [file d0dt02571b1.pdf]

## Supporting Information

### Regulating the Electronic Structure of CoMoO<sub>4</sub> Microrod by Phosphorus Doping as an Efficient Electrocatalyst for Hydrogen Evolution Reaction

Feixiang Jiao<sup>a</sup>, Jinhui Li<sup>a</sup>, Jinlei Wang<sup>a</sup>, Yu Lin<sup>a</sup>, Yaqiong Gong<sup>ab\*</sup>, Xiaofei Jing<sup>b\*</sup>

<sup>a</sup> *Chemical Engineering and Technology, North University of China, Taiyuan, Shanxi 030051, China*

<sup>b</sup> *Northeast Normal University, Key Lab Polyoxometalate Sci, Minist Educ, Changchun, Jilin 130024, China*

\*Corresponding author: Yaqiong Gong: [gyq@nuc.edu.cn](mailto:gyq@nuc.edu.cn); Xiaofei Jing: [jingxf100@nenu.edu.cn](mailto:jingxf100@nenu.edu.cn)

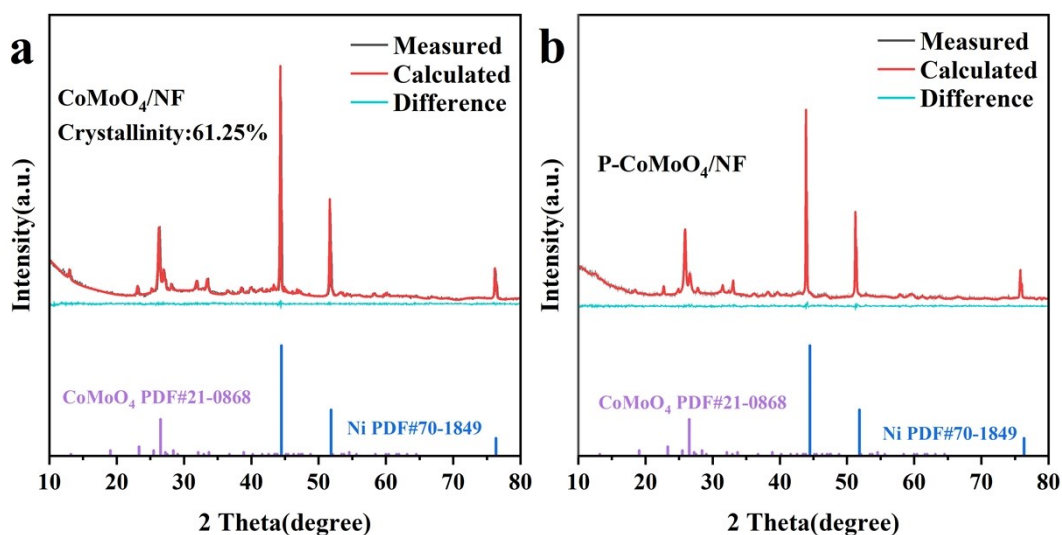

**Fig. S1** Rietveld refinement results of XRD data of (a) CoMoO<sub>4</sub>/NF and (b) P-CoMoO<sub>4</sub>/NF.

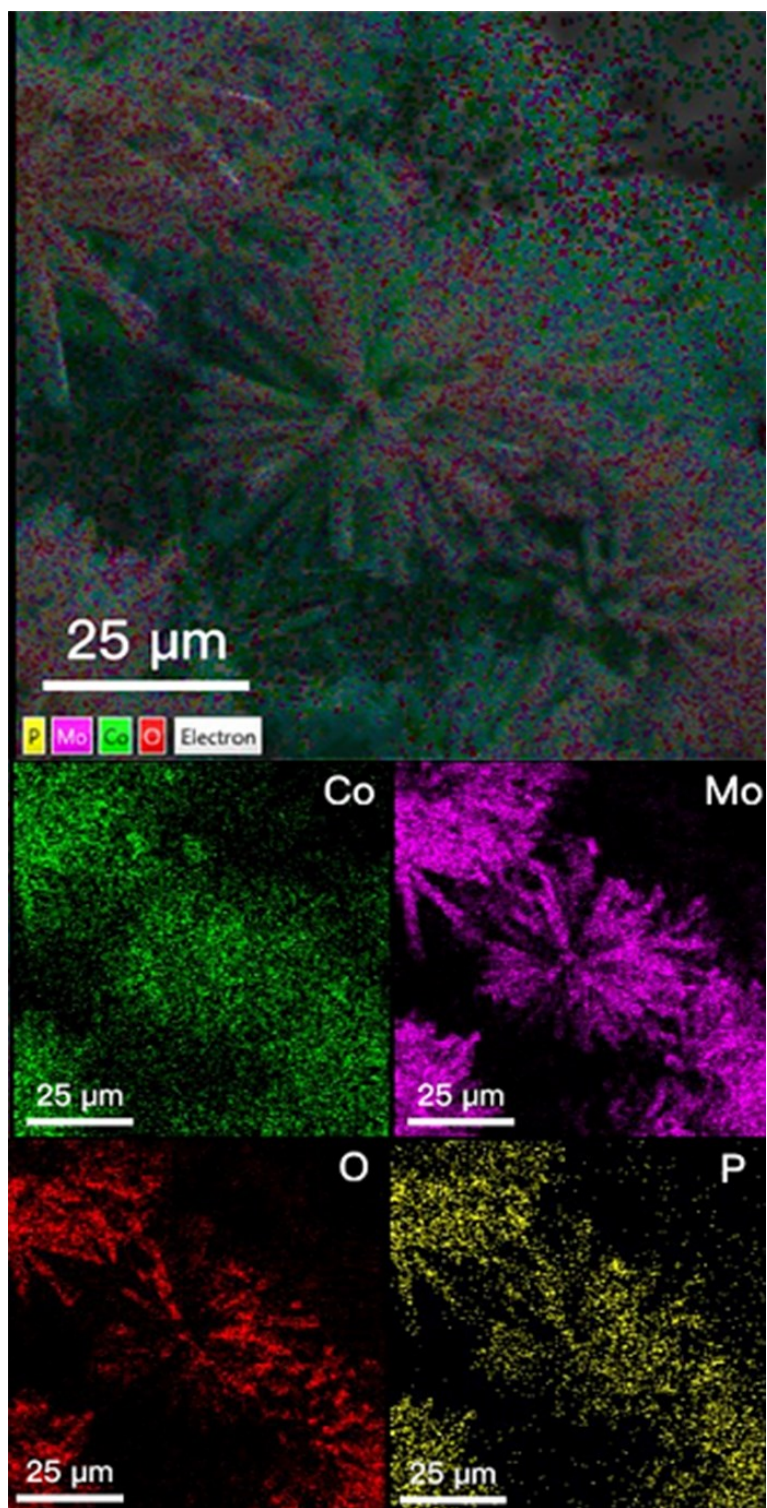

**Fig. S2** EDS element mapping images of P-CoMoO<sub>4</sub>/NF for SEM.

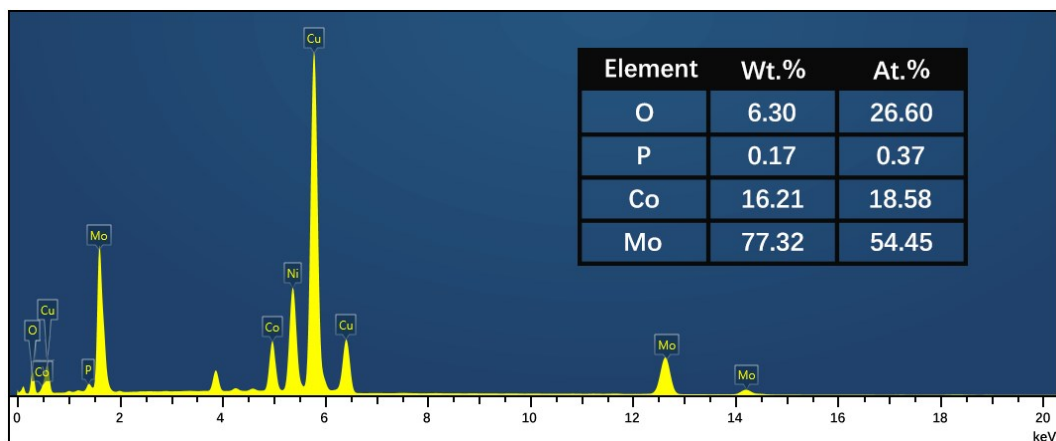

Fig. S3 TEM-EDX spectrum of P-CoMo<sub>4</sub>/NF.

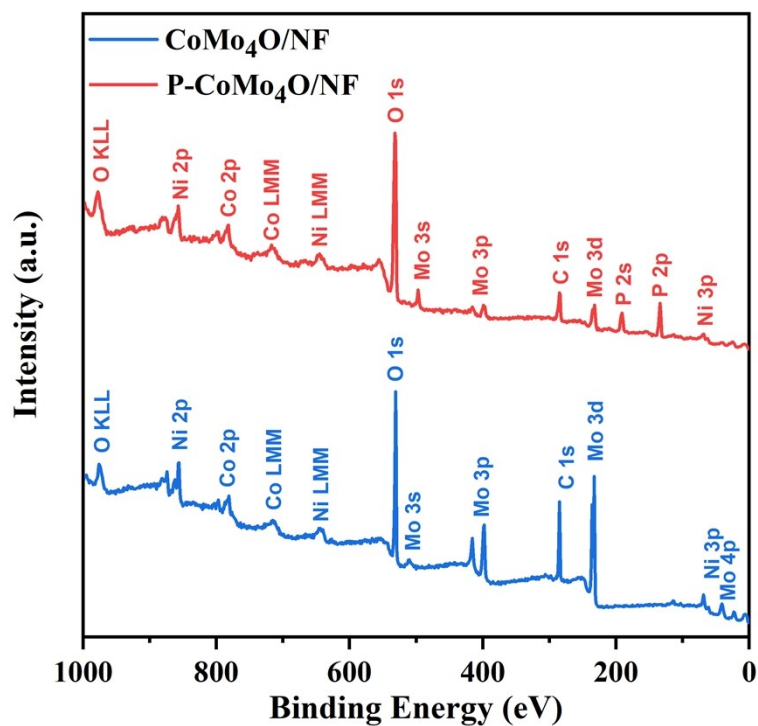

Fig. S4 XPS survey spectrum of P-CoMo<sub>4</sub>/NF and CoMo<sub>4</sub>/NF.

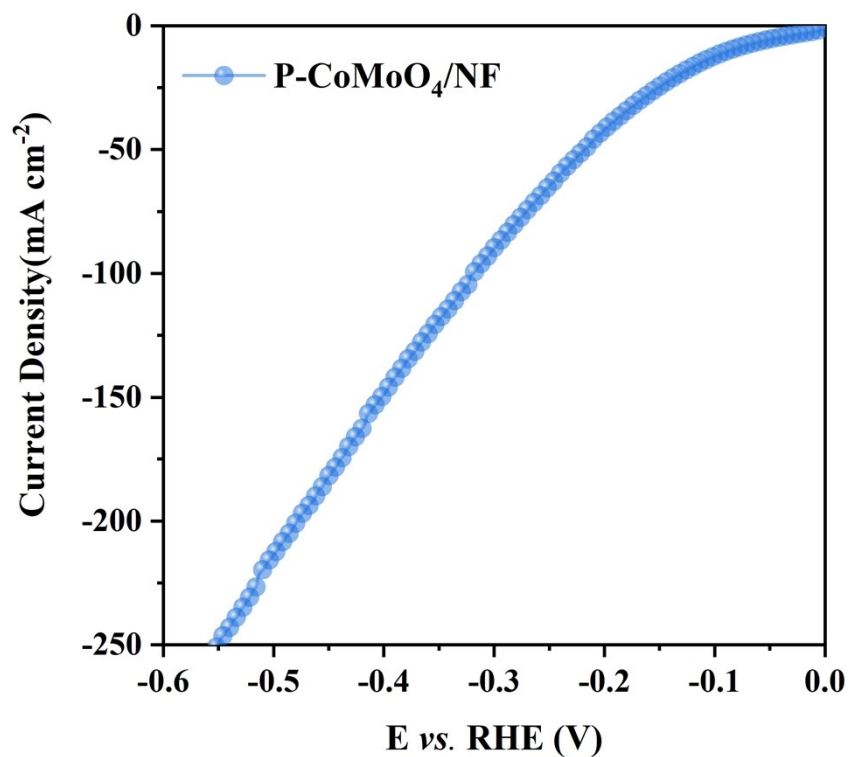

**Fig. S5** LSV polarization curves of P-CoMoO<sub>4</sub>/NF at a scan rate of 5 mV·s<sup>-1</sup> in 1 M KOH.

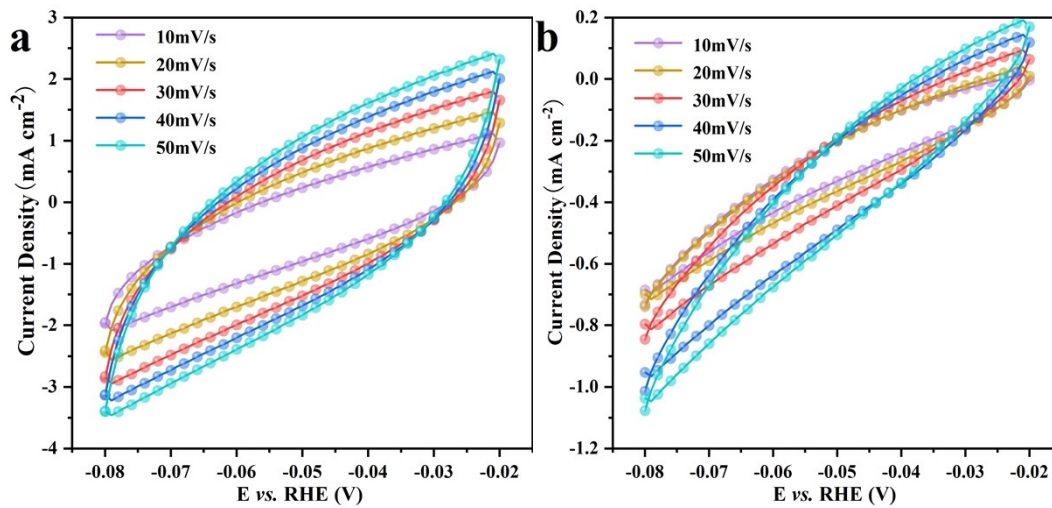

**Fig. S6** CVs for HER of (a) P-CoMoO<sub>4</sub>/NF; (b) CoMoO<sub>4</sub>/NF with different scan rates (10-50 mV s<sup>-1</sup>) in the region from -0.08 to -0.02 vs RHE.

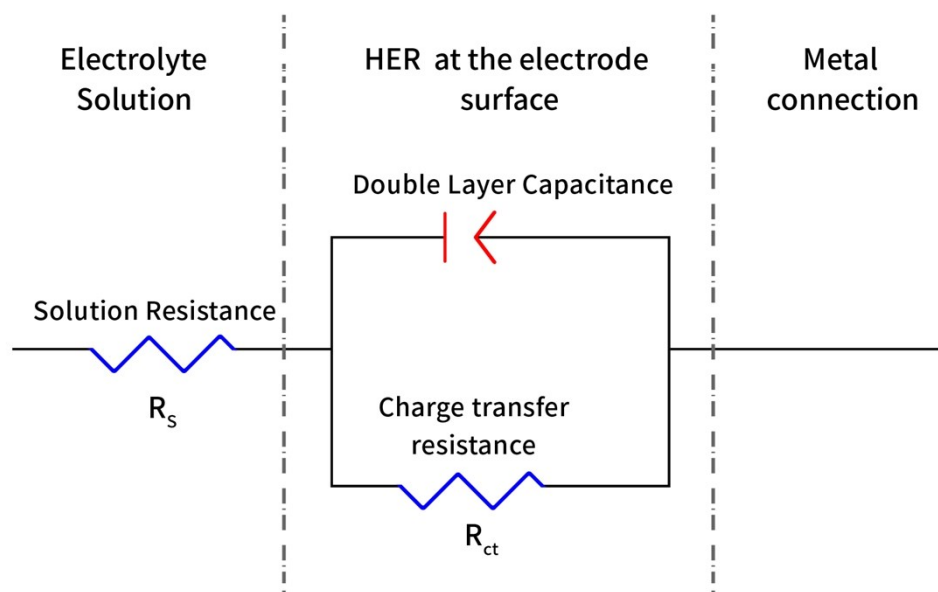

**Fig. S7** A typical simplified Randles circuit for the metal oxides catalyzing HER.

In this simplified Randles circuit,  $R_s$  and  $R_{ct}$  represent the solution resistance and charge transfer resistance, respectively.  $C_{dl}$  element models the double-layer capacitance. The kinetics for Faradaic HER is determined by charge transfer resistance ( $R_{ct}$ ).

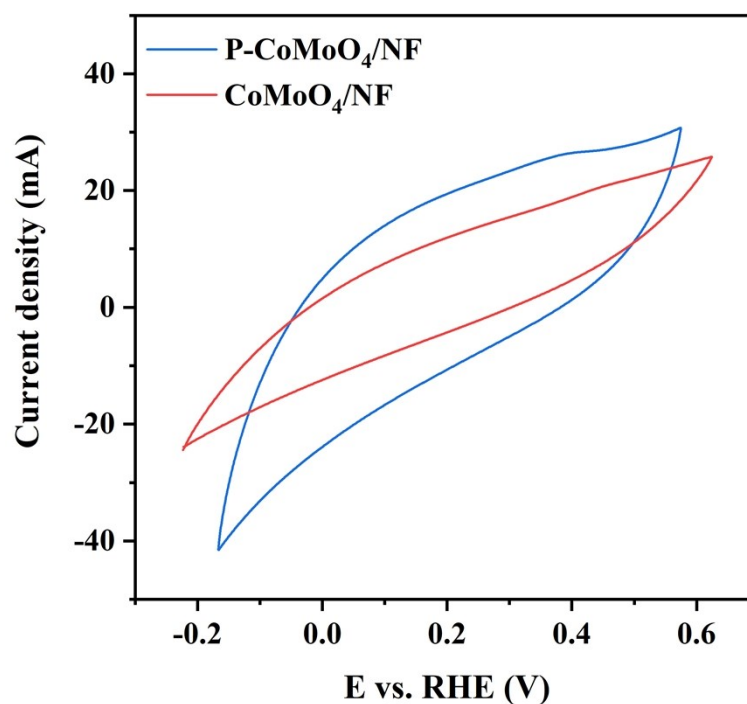

**Fig. S8** CV curves for recorded between -0.2 V and 0.6 V vs. RHE in 1.0 M phosphate buffer saline (PBS) (pH=7) at a scan rate of 50 mV s<sup>-1</sup>.

### Calculation of TOF<sup>1</sup>

The TOF (in s<sup>-1</sup>) were calculated with the following equation:

$$\text{TOF} = \frac{JA}{2Fm}$$

J: current density (in A) during the linear sweep measurement.

A: geometrical electrode area in real.

The factor ½ arrives by taking into account that one hydrogen molecule formed by the required two protons.

m: number of active sites (in mol): the absolute components of the voltammetric charges (cathodic and anodic) tested during one CV cycle (**Fig. S5**) were calculated. Assuming a one electron redox process, this absolute charge was divided by two. The obtained value was then divided by the Faraday constant to get the number of active sites of the catalysts.

F: Faraday constant (in C/mol).

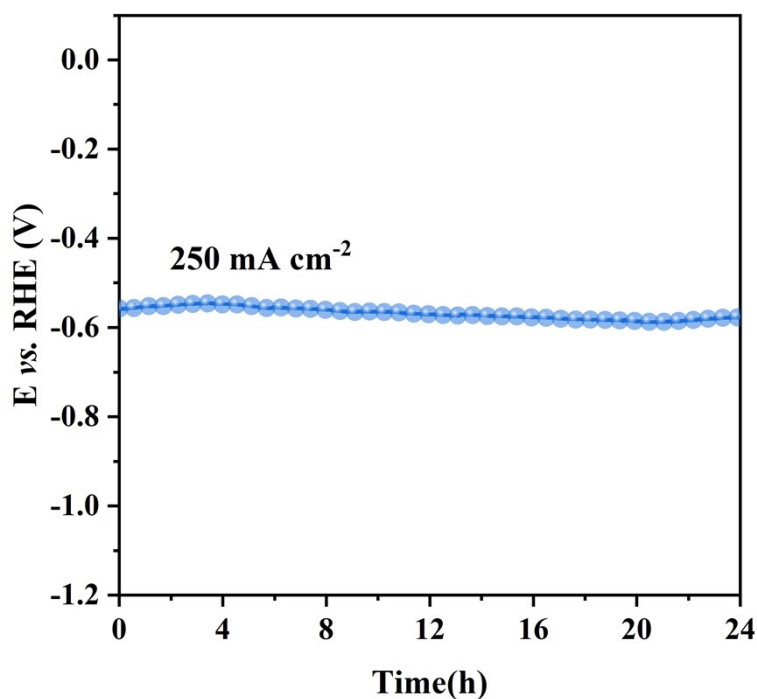

**Fig. S9** Chronopotentiometric curve of P-CoMoO<sub>4</sub>/NF under a constant current density of 250 mA cm<sup>-2</sup> for 24 h in 1 M KOH.

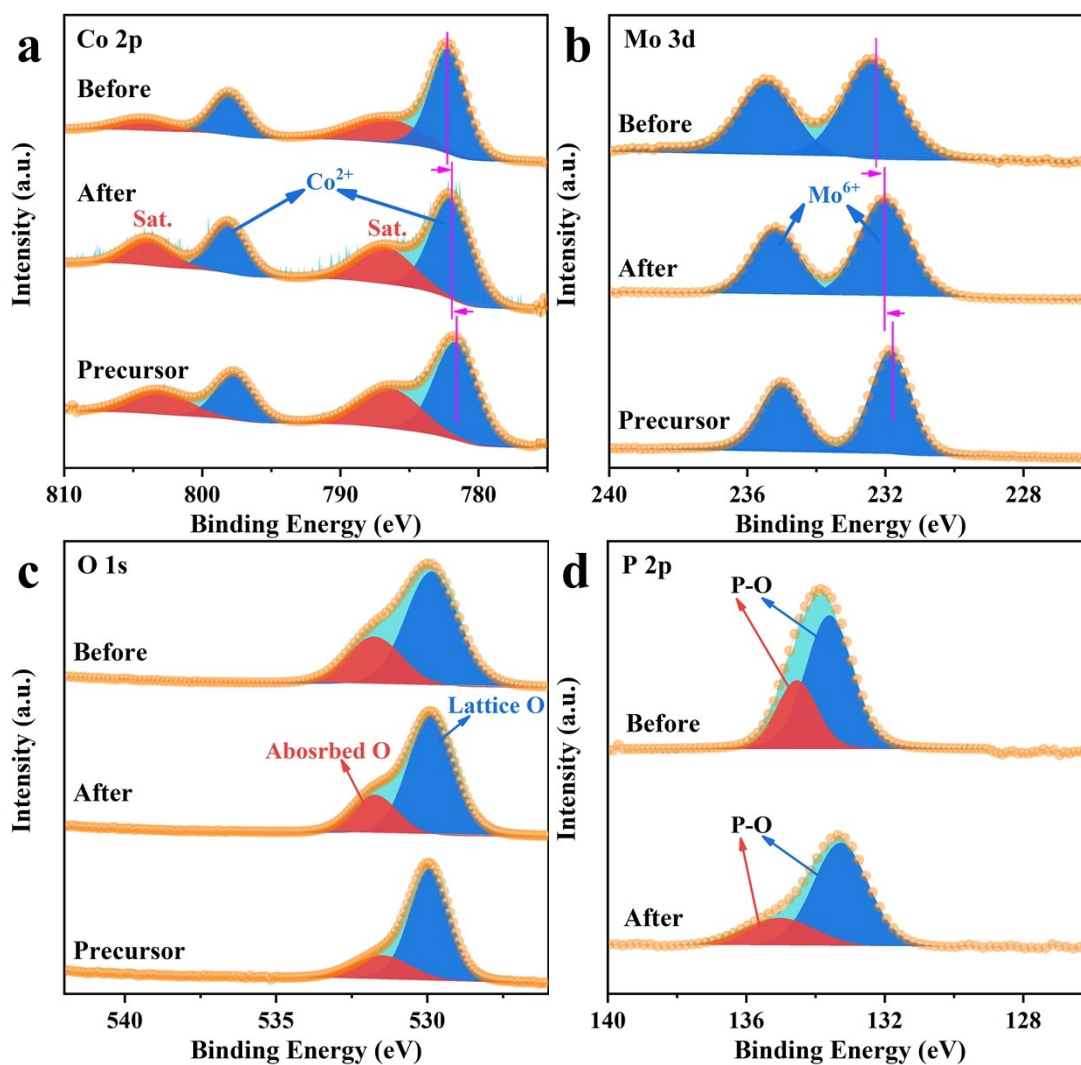

**Fig. S10** XPS spectra of P-CoMoO<sub>4</sub>/NF before and after stability test: (a) Co 2p, (b) Mo 3d, (c) O 1s, (d) P 2p.

**Table S1** Elemental composition of Co, Mo and P determined by ICP-OES.

| Element | Mass Fraction% | Atom% | Mass content (mg g <sup>-1</sup> ) |
|---------|----------------|-------|------------------------------------|
| Co      | 21.16          | 29.12 | 94.72                              |
| Mo      | 76.46          | 64.64 | 342.28                             |
| P       | 2.38           | 6.24  | 10.67                              |

The ratio of Co, Mo and P is ca. 4.7: 10.4: 1.

**Table S2** Comparison of HER performance of the reported and studied samples

| Electrocatalyst                                            | $\eta_{10}$<br>(mV vs. RHE) | b<br>(mV dec <sup>-1</sup> ) | $j_0$<br>(mA cm <sup>-2</sup> ) | Electrolyte                          | Ref       |
|------------------------------------------------------------|-----------------------------|------------------------------|---------------------------------|--------------------------------------|-----------|
| P-CoMoO <sub>4</sub> /NF                                   | 89                          | 59                           | 0.31                            | 1 M KOH                              | this work |
| CoP                                                        | 101                         | 62                           | —                               | 1 M KOH                              | 2         |
| S-MoP NPL                                                  | 104                         | 56                           | 0.14                            | 1 M KOH                              | 3         |
| Co/CoP                                                     | 138                         | 64                           | —                               | 1 M KOH                              | 4         |
| CoP <sub>x</sub>                                           | 94                          | 49.2                         | 0.123                           | 1 M KOH                              | 5         |
| N, P-Mo <sub>x</sub> C NF                                  | 135                         | 57.1                         | 0.047                           | 1 M KOH                              | 6         |
| CoS P/NCNT                                                 | 101                         | 59                           | 0.19                            | 1 M KOH                              | 7         |
| CoP/CC                                                     | 209                         | 129                          | —                               | 1 M KOH                              | 8         |
| O-CoP-2                                                    | 98                          | 59.9                         | 0.231                           | 1 M KOH                              | 9         |
| Co/Co <sub>3</sub> O <sub>4</sub> core/shell<br>nanosheets | 95                          | 44                           | —                               | 1 M KOH                              | 10        |
| MoP nanosheets                                             | 100                         | 56.4                         | —                               | 0.5 M H <sub>2</sub> SO <sub>4</sub> | 11        |
| MoO <sub>2</sub> P <sub>x</sub> /Mo                        | 135                         | 62                           | —                               | 0.5 M H <sub>2</sub> SO <sub>4</sub> | 12        |
| P-Mo <sub>2</sub> C@C                                      | 89                          | 42                           | 0.18                            | 0.5 M H <sub>2</sub> SO <sub>4</sub> | 13        |
| MoDCA-5                                                    | 78                          | 41                           | 0.178                           | 0.5 M H <sub>2</sub> SO <sub>4</sub> | 14        |
| Co-Mo <sub>2</sub> C-0.020                                 | 140                         | 39                           | 0.0051                          | 0.5 M H <sub>2</sub> SO <sub>4</sub> | 15        |

$\eta_{10}$ : the overpotential at a current density of 10 mA cm<sup>-2</sup>.



### Calculation of $j_0$ <sup>16</sup>

The exchange current density ( $j_0$ ) is another crucial kinetic parameter in electrocatalysis that is correlated to the rate of electron transfer under reversible conditions (that is, at zero overpotential). The magnitude of the exchange current density influences the rate of the electrochemical reaction at other potentials. The Tafel equation can be used to describe the current-potential relationship at a significant overpotential ( $\eta$ ):

$$\eta = b \log(j/j_0)$$

where  $j$  is the current density,  $j_0$  is the exchange current density and  $b$  is the Tafel slope.

### Reference

1. J. Zhang, T. Wang, P. Liu, Z. Q. Liao, S. H. Liu, X. D. Zhuang, M. W. Chen, Ehrenfried Zschech, X. L. Feng, *Nat. Commun.*, 2017, **8**, 15437-15444.
2. X. K. Huang, X. P. Xu, X. X. Luan, D. J. Cheng, *Nano Energy*, 2020, **68**, 104332-104340.
3. K. Liang, S. Pakhira, Z. Z. Yang, A. Nijamudheen, L. C. Ju, M. Y. Wang, C. I. A. Velez, G. E. Sterbinsky, Y. G. Du, Z. X. Feng, J. L. M. Cortes and Y. Yang, *ACS Catal.*, 2018, **9**(1), 651-659.
4. H. Wang, S. X. Min, Q. Wang, D. B. Li, G. Casillas, C. Ma, Y. Y. Li, Z. X. Liu, L. J. Li, J. Y. Yuan, M. Antonietti, T. Wu, *ACS Nano*, 2017, **11**, 4358-4364.
5. R. Zhang, X. X. Wang, S. J. Yu, T. Wen, X. W. Zhu, F. X. Yang, X. N. Sun, X. K. Wang and W. P. Hu, *Adv. Mater.*, 2017, **29**(9), 1605502-1605507.
6. Y. Y. Chen, Y. Zhang, W. J. Jiang, X. Zhang, Z. H. Dai, L. J. Wan, J. S. Hu, *ACS Nano*, 2016, 8851-8860.
7. D. J. Li, J. Kang, H. J. Lee, D. S. Choi, S. H. Koo, B. C. Han and S. O. Kim, *Adv. Energy Mater.*, 2018, **8**(13), 1702806-1702812.
8. J. Q. Tian, Q. Liu, A. M. Asiri, X. P. Sun, *J. Am. Chem. Soc.*, 2014, **136**(21), 7587-7590.

9. G. Y. Zhou, M. Li, Y. L. Li, H. Dong, D. M. Sun, X. E. Liu, L. Xu, Z. Q. Tian and Y. W. Tang, *Adv. Funct. Mater.*, 2019, **30**(7), 1905252-1905259.
10. X. D. Yan, L. H. Tian, M. He, X. B. Chen, *Nano Lett.*, 2015, **15**(9), 6015-6021.
11. W. Cui, N. Y. Cheng, Q. Liu, C. J. Ge, A. M. Asiri, X. P. Sun, *ACS Catal.*, 2014, **4**(8), 2658-2661.
12. X. Xie, R. J. jin Yu, N. Xue, A. B. Yousaf, Hong Du, Kuang Liang, Nan Jianga, An-Wu Xu, *J. Mater. Chem. A*, 2016, **4**(5), 1647-1652.
13. Z. P. Shi, K. Q. Nie, Z. J. Shao, B. X. Gao, H. L. Lin, H. B. Zhang, B. L. Liu, Y. X. Wang, Y. H. Zhang, X. H. Sun, X. M. Cao, P. Hu, Q. S. Gao, Y. Tang, *Energy Environ. Sci.*, 2017, **10**(5), 1262-1271.
14. R. G. Ma, Y. Zhou, Y. F. Chen, P. X. L, Q. Liu, J. C. Wang, *Angew. Chem. Int. Ed.*, 2015, **54**(49), 14723-14727.
15. H. L. Lin, N. Liu, Z. P. Shi, Y. L. Guo, Y. Tang, Q. S. Gao, *Adv. Funct. Mater.*, 2016, **26**(31), 5590-5598.
16. C. G. M. Guio, L. A. Stern and X. L. Hu, *Chem. Soc. Rev.*, 2014, **43**(18), 6555-6569.
